# Supplementary material for: Factors associated with overweight: are the conclusions influenced by choice of the regression method?
Source: Springer Nature journal article supplement (doi:10.1186/s12889-016-3340-2), 2016-07-26
Supplement: MOESM1 [file 10521056]

Additional file 1 - Questionnaire

**ILL BEGIN THIS INTERVIEW ASKING A FEW QUESTIONS ABOUT YOUR WORK**

**A1. In how many places do you work on nursing?**

- 1  One
- 2  Two
- 3  Three or more

**A2. Do you work regularly (at least once a week / 4 times a month) at night shifts in nursing assistance in some place?**

- 1  Yes
- 2  No GO TO A4

**A3. For how long have you been working at night in nursing, here or in another place?**

\_\_\_\_\_years.       Less than one year. GO TO B1

**A4. Have you ever worked nights?**

- 1  Yes, regularly, at least once a week.
- 2  Yes, occasionally or rarely.
- 3  No GO TO B1

**A5. For how long did you work at night?**

\_\_\_\_\_years.       Less than one year.

**I WOULD NOW LIKE TO ASK SOME QUESTIONS ABOUT YOUR HEALTH**

**B1. In a general way, compared to people you age, how do you consider your health to be?**

1  Very good      2  Good      3  Regular      4  Bad      5  Very bad

**B2. In relation to your sleep, how often did you:**

|                                                                     | Never                      | Rarely                     | A few times                | Almost always              | Always                     |
|---------------------------------------------------------------------|----------------------------|----------------------------|----------------------------|----------------------------|----------------------------|
| a) Have difficulty falling asleep?                                  | 1 <input type="checkbox"/> | 2 <input type="checkbox"/> | 3 <input type="checkbox"/> | 4 <input type="checkbox"/> | 5 <input type="checkbox"/> |
| b) Waking up during the night (more than three times)?              | 1 <input type="checkbox"/> | 2 <input type="checkbox"/> | 3 <input type="checkbox"/> | 4 <input type="checkbox"/> | 5 <input type="checkbox"/> |
| c) Wake up before the desired time and not managing to sleep again? | 1 <input type="checkbox"/> | 2 <input type="checkbox"/> | 3 <input type="checkbox"/> | 4 <input type="checkbox"/> | 5 <input type="checkbox"/> |

**B3. How much you weighed at age 20, approximately?**

\_\_\_\_\_. \_\_\_\_\_ Kg      777  don't know/don't remember

**B4. What is your current weight (if pregnant, tell your pre-pregnancy weight)?**

\_\_\_\_\_. \_\_\_\_\_ Kg      777  don't know/don't remember



**THE NEXT QUESTIONS ARE ABOUT ASPECTS OF  
YOU PERSONAL HISTORY**

**C1. What is the educational background of your mother?**

- 1  didn't go to school  
 2  Elementary school incomplete  
 3  Elementary school complete  
 4  Secondary school incomplete  
 5  Secondary school complete  
 6  University (College) incomplete  
 7  University (College) complete  
 8  didn't know her/died early

**C2. What is your age? \_\_\_\_\_ years**

**C3. What is your educational background?**

- 1  University degree complete  
 2  Post-graduation (specialization, residency)  
 3  Master degree  
 4  Doctorate degree

**C4. What is your marital status?**

- 1  married or living together  
 2  separated or divorced  
 3  widow(er)  
 4  single (Never been married or lived in a union)

**C5. How many children born alive do you have or did you have?**

\_\_\_\_\_ children                      0  I did not have children.

**C6. Do you have children under six years old living with you?**

- 1  Yes  
 2  No

**C7. The Brazilian Institute of Statistics (IBGE) uses the words black, brown, white, yellow and indigenous to classify people's colour or race. If you had to answer the IBGE survey today, how would you classify yourself in this respect?**

1  Black                      2  Brown                      3  White                      4  Yellow                      5  Indigenous

**C8. Including you, how many people live in your house? \_\_\_\_\_ people**

**C9. When you are at home, is it your responsibility to:**

| Task                                                                                  | Yes, entirely              | Yes, most of the time      | Divided equally            | Yes, partly                | No                         |
|---------------------------------------------------------------------------------------|----------------------------|----------------------------|----------------------------|----------------------------|----------------------------|
| Take care of children/teenagers?<br>9 <input type="checkbox"/> I don't have children. | 1 <input type="checkbox"/> | 2 <input type="checkbox"/> | 3 <input type="checkbox"/> | 4 <input type="checkbox"/> | 5 <input type="checkbox"/> |
| Do the cleaning?                                                                      | 1 <input type="checkbox"/> | 2 <input type="checkbox"/> | 3 <input type="checkbox"/> | 4 <input type="checkbox"/> | 5 <input type="checkbox"/> |
| Cook?                                                                                 | 1 <input type="checkbox"/> | 2 <input type="checkbox"/> | 3 <input type="checkbox"/> | 4 <input type="checkbox"/> | 5 <input type="checkbox"/> |
| Wash clothes?                                                                         | 1 <input type="checkbox"/> | 2 <input type="checkbox"/> | 3 <input type="checkbox"/> | 4 <input type="checkbox"/> | 5 <input type="checkbox"/> |
| Iron clothes?                                                                         | 1 <input type="checkbox"/> | 2 <input type="checkbox"/> | 3 <input type="checkbox"/> | 4 <input type="checkbox"/> | 5 <input type="checkbox"/> |
