# Supplementary material for: Factors associated with overweight: are the conclusions influenced by choice of the regression method?
Source: Springer Nature journal article supplement (doi:10.1186/s12889-016-3340-2), 2016-07-26

**Additional file 2 - Analysis of standardized Pearson residuals from the linear model**

**Normal Q-Q Plot**

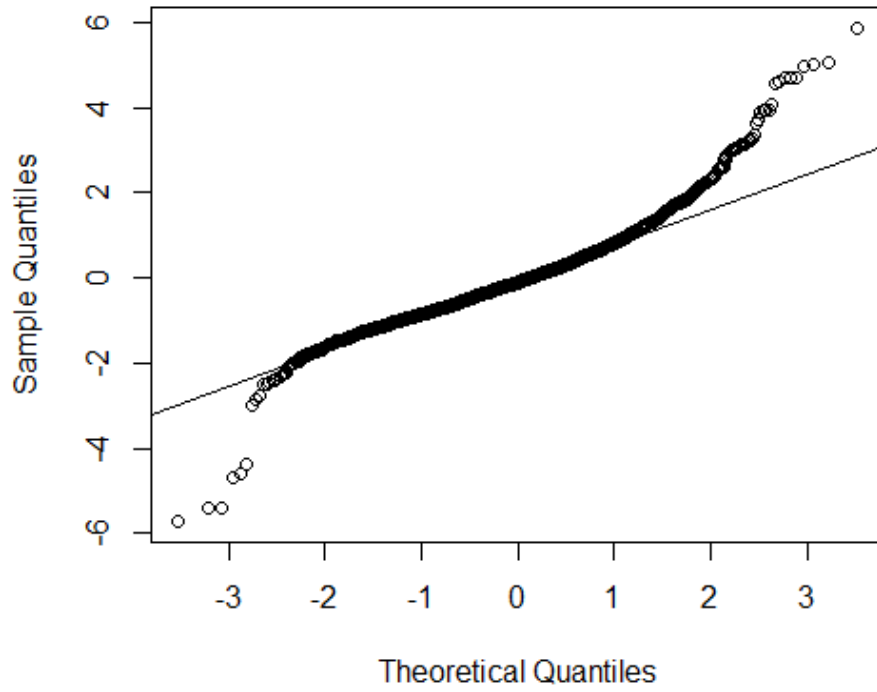

Supplement: MOESM2 [file 10521056]
